# Supplementary material for: What has brain diffusion MRI taught us about chronic pain: a narrative review
Source: bioRxiv or medRxiv preprint supplement (doi:10.1101/2023.03.03.23286579), 2023-12-24
Supplement: Supplementary file [file media-1.pdf]

## **Appendix: Search strategies**

In PubMed, the following strategy has been used:

```
((("mri"[Title/Abstract] OR "magnetic resonance imaging"[Title/Abstract] OR  
"NMR"[Title/Abstract] OR "nuclear magnetic resonance"[Title/Abstract]) AND  
("diffusion"[Title/Abstract] OR "DTI"[Title/Abstract])) OR "tensor  
imaging"[Title/Abstract]) AND "pain"[Title/Abstract] AND "brain"[Title/Abstract]
```

In PubMed (MeSH), the following strategy has been used:

```
"Diffusion Magnetic Resonance Imaging"[MeSH Terms] AND "Pain"[MeSH Terms]  
AND "Brain"[MeSH Terms]
```

In Scopus, the follow strategy has been used:

```
( TITLE-ABS-KEY ( ( ( mri OR "magnetic resonance imaging" OR nmr OR "nuclear  
magnetic resonance" ) W/2 ( diffusion ) ) OR dti OR "tensor imaging" ) AND TITLE-  
ABS-KEY ( pain ) AND TITLE-ABS-KEY ( brain ) ) AND NOT INDEX ( medline )
```
